# **The mutual repression between Pax2 and Snail factors regulates the epithelial/mesenchymal state during intermediate mesoderm differentiation**

Juan M. Fons<sup>1,‡</sup>, Oscar H. Ocaña<sup>1,‡,\*</sup> and M. Angela Nieto<sup>1,2,\*</sup>

<sup>1</sup>Instituto de Neurociencias (CSIC-UMH), Avda. Ramón y Cajal s/n, Sant Joan d'Alacant, Spain

<sup>2</sup>CIBERER, Centro de Investigación Biomédica en Red de Enfermedades Raras, ISCIII, Spain

\* Authors for correspondence

[ohocana@cnic.es](mailto:ohocana@cnic.es)

[anieto@umh.es](mailto:anieto@umh.es)

Present addresses

<sup>‡</sup> Centre for Craniofacial and Regenerative Biology, King's College London, Guy's Hospital, SE1 9RT, London

<sup>‡</sup> Cardiovascular Development Program, Centro Nacional de Investigaciones Cardiovasculares (CNIC), Madrid, Spain.

Running title (61): Snail1 and Pax2 antagonism controls mesoderm differentiation

Summary (19 words): The antagonism between Snail and Pax2 factors in the embryonic differentiation zone, tightly regulates the timing of mesodermal epithelialisation

## ABSTRACT

The pronephros is the first renal structure in the embryo, arising after mesenchymal to epithelial transition (MET) of the intermediate mesoderm, where Pax2 induces epithelialisation of the mesenchyme. Here we show that, in the early embryo, Snail1 directly represses *Pax2* transcription maintaining the intermediate mesoderm in an undifferentiated state. Reciprocally, Pax2 directly represses *Snail1* expression to induce MET upon receiving differentiation signals. We also show that BMP7 acts as one such signal by downregulating *Snail1* and upregulating *Pax2* expression. This, together with the Snail1/Pax2 reciprocal repression, establishes a regulatory loop in a defined region along the anteroposterior axis, the bistability domain within the transition zone, where differentiation of the neural tube and the somites are known to occur. Thus, we show that the antagonism between Snail1 and Pax2 determines the epithelial/mesenchymal state during the differentiation of the intermediate mesoderm and propose that the bistability zone extends to the intermediate mesoderm, synchronizing the differentiation of tissues aligned along the mediolateral embryonic axis.

## INTRODUCTION

During embryonic development, most of the tissues are derived from the sequential activation of epithelial-mesenchymal (EMT) and mesenchymal-epithelial transitions (MET) (Thiery et al., 2009). A prototypic example is the development of the sequential renal structures, pronephros and metanephros. The pronephros is the first epithelial structure of the urogenital system that arises from the intermediate mesoderm after MET. It encompasses the nephric duct and nephric cord running along both sides of the embryo adjacent to the somites. It elongates posteriorly until it reaches the metanephric mesenchyme where the adult kidney will develop (James and Schultheiss, 2003)(Dressler, 2009).

Snail transcription factors are potent EMT inducers in the embryo at gastrulation (Acloque et al., 2011) and neural crest delamination (Nieto et al., 1994), among other embryonic processes. During the development of the renal system in vertebrates, they are expressed in the intermediate mesoderm

before pronephros epithelialisation and later in the metanephric mesenchyme prior to the MET that leads to the formation of the renal vesicle (Boutet et al., 2006). In both cases, epithelialisation concurs with the repression of Snail factors, which are maintained silent in the adult, although they are reactivated in pathological conditions like fibrosis, where they induce a partial EMT and instruct the interstitium to promote fibrogenesis and inflammation (Grande et al., 2015)(Lovisa et al., 2015). If the reactivation occurs in cancer cells, they disseminate from the primary tumour initiating the metastatic cascade (Ocaña et al., 2012)(Yang et al., 2020). By contrast, *Pax2* is an essential promotor of MET and required for the specification of the renal epithelial lineage (Dressler et al., 1993)(Torres et al., 1995)(Bouchard et al., 2002). It is expressed in the intermediate mesoderm just prior to MET and continues to be expressed in the epithelial derivatives of the pronephros, mesonephros and metanephros (Dressler et al., 1990)(Dressler and Douglass, 1992)(Bouchard et al., 2000)(Bouchard et al., 2002)(Narlis et al., 2007). Another important molecule that promotes epithelialisation and MET during renal development and fibrosis is BMP7, a member of the TGF $\beta$  superfamily (Massagué, 2012) expressed in the pronephros, mesonephros and metanephros (Lyons et al., 1995)(Vukicevic et al., 1996). In agreement with this, *Bmp7* null mutant mice display renal hypoplasia with a reduction of the epithelial compartment (Dudley et al., 1995)(Luo et al., 1995). Furthermore, BMP7 treatment prevents and reverses acute renal fibrosis restructuring the epithelial tubules of the kidney inducing MET by antagonizing TGF $\beta$  signalling (Zeisberg et al., 2003)(Sato et al., 2003)(Zavadil et al., 2004)(Zeisberg et al., 2005), a well known EMT inducer and *Snail* transcriptional activator (Peinado et al., 2003).

We have examined the relationship between EMT and MET inducers Snail, *Pax2* and *Bmp7* in the intermediate mesoderm, as it is an excellent model to study epithelial plasticity in the embryo and found that a reciprocal repression between Snail1 and *Pax2* controls the timing of differentiation. This negative regulatory loop is triggered by *Bmp7*, which simultaneously represses Snail1 and activates *Pax2* expression. This loop is activated in the region where differentiation of the neural tube and the paraxial mesoderm also occurs,

indicating that it is integrated in the synchronization of differentiation processes along the mediolateral axis.

## RESULTS AND DISCUSSION

### ***Snail1* and *Pax2* are expressed in mutually exclusive domains in the developing mesoderm**

Given that the silencing of *Snail1* expression correlates with the epithelialisation of the metanephros (Boutet et al., 2006) and that *Pax2* is required for the epithelialisation of pro and metanephros (Bouchard et al., 2002)(Narlis et al., 2007), we decide to compare the expression of both factors at early stages of mesoderm development in the chick embryo (Fig. 1). *Snail1* is expressed in mesenchymal tissues including the undifferentiated intermediate and lateral mesoderm (Fig.1A-C) but absent from the nephric duct and cord of the pronephros (Fig.1B). By contrast, *Pax2* is expressed in the epithelial structures of the pronephros but not in the undifferentiated intermediate mesoderm (Fig.1D-F). We performed a double FISH and confirmed the absence of *Snail1/Pax2* co-expression (Fig.1G-I). These results show that *Snail1* and *Pax2* expression domains are mutually exclusive in the developing embryo and, in particular, in the differentiating intermediate mesoderm.

### ***Snail1* prevents epithelialisation of the intermediate mesoderm by directly repressing *Pax2* transcription**

The expression pattern of *Snail1* and *Pax2* and their described roles in EMT/MET regulation already suggests a possible genetic interaction. To address this, we first performed gain of function experiments by co-electroporating plasmids coding for *Snail1* and GFP and analysed *Pax2* expression (Fig. 2A-D). The regions of the intermediate mesoderm with *Snail1* ectopic expression, (Fig. 2A,B green), showed a downregulation of *Pax2* expression, when compared with the control electroporation and the contralateral side (Fig. 2C,D arrow and asterisk; Fig. S1A-D). Analysis of the *Pax2* promoter showed an E box compatible with *Snail1* binding (Cano et al., 2000) (Fig. 2E). Luciferase assays in the *Pax2*-positive human renal embryonic epithelial cells HEK293T (Tamimi et al., 2008) show that *Snail1*

can repress *Pax2* promoter activity (Fig. 2F) in a dose-dependent manner (Fig. S2A-C). Furthermore, the mutation of the E box into a sequence to which Snail1 does not bind (Batlle et al., 2000) restored promoter activity (Fig. 2F). Chromatin immunoprecipitation assays from chick embryo tissues obtained after electroporation of a plasmid encoding a Myc-tagged Snail1 version (Acloque et al., 2011) confirm the enrichment for Snail binding to the *Pax2* promoter (Fig. 2G), indicating that Snail1 behave as a direct repressor of *Pax2* expression *in vivo*. Thus, *Snail1* expression can maintain the intermediate mesoderm in an undifferentiated and mesenchymal state by preventing *Pax2* expression and with that, the premature differentiation of the pronephros. This is in agreement with the finding that the intermediate mesoderm fails to become epithelial and remains mesenchymal in *Pax2* mutant mice (Torres et al., 1995). As *Snail1* endogenous silencing in the metanephric mesenchyme correlates with MET and renal differentiation (Boutet et al, 2006), and differentiation relies on *Pax2* upregulation (Narlis et al., 2007), it is likely that *Snail1* also prevents premature metanephros differentiation by repressing *Pax2* expression, in addition to its previously described role in repressing *HNF1 $\beta$*  and *Cadherin 16* expression (Boutet et al., 2006).

### **A Snail1/Pax2 reciprocal inhibitory loop regulates the differentiation of the intermediate mesoderm**

As *Pax2* is required for MET and renal differentiation (Rothenpieler and Dressler, 1993)(Torres et al., 1995)(Bouchard et al., 2002) and *Snail1* silencing is essential for pronephros differentiation (Fig. 2), we wondered whether *Pax2* promoted MET in the intermediate mesoderm at least in part by repressing *Snail1* transcription. We performed gain of function experiments for *Pax2* as described above for *Snail1* (Fig. 3A-D; Fig. S1E-H). The areas of *Pax2* ectopic expression (Fig. 3A, green) are devoid of *Snail1* transcripts (Fig. 3A-D, asterisks indicate the effect on the intermediate mesoderm). Interestingly, the electroporated mesoderm shows cellular aggregates compatible with a MET process (Fig. 3A, arrowheads), which was confirmed by the re-expression of E-cadherin in the electroporated area (Fig. S3). These results show that the sole activation of *Pax2* expression in *Snail1*-positive

intermediate and lateral mesoderm is sufficient to induce epithelialisation. Thus, we examined whether Pax2 could also act as a *Snail1* repressor. We identified a Pax2 binding site (GGGCATGG) 116bp upstream of the *Snail1* TSS (JASPAR database) and a luciferase assay in a primary culture of chick embryonic fibroblasts showed that a fragment of 150 bp upstream the TSS co-transfected with a Pax2-encoding vector was sufficient to repress *Snail1* promoter activity in a dose-dependent manner (Fig. 3 E,F and Fig. S2D-F). Deletion of the Pax2 binding site impaired this repression (Fig. 3F). We next performed ChIP analysis in chick embryo tissues and confirmed that Pax2 can bind to the *Snail1* promoter *in vivo* (Fig. 3G).

Altogether, these data show that, similar to *Snail1* repressing *Pax2* transcription, Pax2 represses *Snail1* transcription by direct binding to its promoter. Thus, *Snail1* and Pax2 establish a reciprocal negative loop, a mechanism widely used during development when fate decisions involve binary choices (Zhou and Huang, 2011). This is observed in the subdivision of embryonic territories, including the decision to become trophectoderm or inner cells mass (*Cdx2/Oct4*) or ectodermal versus mesendodermal (*SoxB1/Snail*) (Niwa et al., 2005)(Acloque et al., 2011)(Acloque et al., 2012). This reciprocal repression between *Snail1* and Pax2 is also likely to occur during metanephros development and may also have a correlate in pathological conditions. *Pax2* reactivation occurs in fibrotic or injured kidneys (Imgrund et al., 1999)(Hou et al., 2018), and this is thought to be an attempt to recover the normal renal epithelial architecture either through MET of the renal mesenchyme or by increasing proliferation of the remaining epithelial cells (Lindoso et al., 2009). We propose that this role of *Pax2* reactivation maybe achieved by counteracting the activation of *Snail1* in renal epithelial cells upon injury (Grande et al., 2015).

### **Bmp7 controls pronephros differentiation by repressing *Snail1* and inducing *Pax2* expression in the Bistability Domain**

Then we investigated signalling pathways that could be regulating these genes. We focused on BMP members as they induce pronephros differentiation. Specifically, we tested Bmp7, as it is also required for MET and

differentiation of the metanephros (Dudley et al., 1995)(Luo et al., 1995)(Vukicevic et al., 1996). *Bmp7* is expressed in the ectoderm, dorsal neural tube, the notochord and in the pronephros (Fig. 4A,B) and we decided to challenge the embryo by administering BMP7 and assessing its impact on *Snail1* and *Pax2* expression.

BMP7 represses *Snail1* transcription in the mesoderm, including the intermediate mesoderm (Fig. 4C,D, asterisks, Fig. S4A-H). In addition, it induces *Pax2* transcription in the paraxial/somatic mesoderm (Fig. 4E,F, arrows, see also Suppl. Fig. 4I-P), while represses Paraxis (Fig. S5). This is consistent with the gradient of BMP signalling in patterning the mesoderm along the mediolateral axis in the chick embryo among other vertebrates (James and Schultheiss, 2005) and with recent data showing that the embryo interprets *Bmp7* concentrations thresholds (Greenfeld et al., 2021). Thus, *Bmp7* induces pronephros differentiation through two independent mechanisms, by repressing an EMT inducer, *Snail1*, and by inducing a MET inducer, *Pax2* in the intermediate mesoderm. The ectoderm is very likely the source of *Bmp7*, as ectodermal removal impairs pronephros differentiation (Obara-Ishihara et al., 1999). And again, these data and expression studies suggest that *Bmp7* may also control metanephros epithelialisation and differentiation through the same mechanism. In addition, the mechanism behind the attenuation of renal fibrosis by BMP7 (Zeisberg et al., 2003)(Zeisberg et al., 2005) is likely mediated by the repression of *Snail1* and the induction of *Pax2*.

The ability of BMP7 to activate *Pax2* expression in the paraxial mesoderm occurs in a specific region of the anteroposterior axis of the embryo. In addition, we did not observe *Pax2* induction in territories that are naturally incompetent to express it, like the lateral mesoderm, or outside the bistability domain (Fig. 4E,F). This is compatible with the described competence of the cells to respond to BMP according to the embryonic anteroposterior level, synchronizing the differentiation in the different axes (Tucker et al., 2008). As such, the response is within the transition zone (TZ), and restricted to the bistability domain (BD)(Fig. 4E,F, arrows) (Fig. S4I-P). The bistability domain



is defined as a convergent area of two opposing gradients within the anterior one-third of the TZ, an anteroposterior gradient of retinoic acid and a posteroanterior gradient of FGF/Wnt (Del Corral and Storey, 2004)(Olivera-Martinez and Storey, 2007)(Goldbeter et al., 2007)(Aulehla and Pourquié, 2010), where neurogenesis (Del Corral and Storey, 2004) and somitogenesis (Aulehla and Pourquié, 2010) occur. Differentiation at the bistability zone is perfectly compatible with the region where binary choices occur (Goldbeter et al., 2007), and particularly with the establishment of reciprocal negative loops as we describe here for *Snail1* and *Pax2* (Zhou and Huang, 2011).

Interestingly, retinoic acid induces pronephros differentiation (Cartry et al., 2006)(Wingert et al., 2007) and it is known to repress *Snail1* during somite epithelialisation (Morales et al, 2007). In addition, *Snail1* is downstream of the Wnt/FGF signaling pathway during somitogenesis, and it needs to be repressed for epithelialisation to occur (Dale et al., 2006). Our results show that the bistability domain not only regulates neurogenesis and somitogenesis but also pronephros development. We propose a model for pronephros differentiation (Fig. 4G) in which *Bmp7*, represses *Snail1* expression and, in combination with other signals, induces *Pax2* transcription in the intermediate mesoderm. *Snail1* maintains an undifferentiated state of the intermediate mesoderm in the posterior part of the embryo, and at the bistability domain, *Snail1* and *Pax2* establish a negative reciprocal loop that leads to epithelialisation. Thus, we extend the bistability domain to the intermediate mesoderm, acting as the region in the anteroposterior axis for the initiation of differentiation, synchronizing the different cell populations along the mediolateral axis of the embryo.

## Material and Methods

### Chick embryonic fibroblast isolation

Muscle fragments from HH35 chick embryos were dissected in PBS at 37°C and disaggregated with trypsin for 5 minutes at RT. The homogenize were centrifuged at 1100 rpm for 6 minutes and the pellet were suspended in F-12/HAM and seeded on p10.



## Cell culture

HEK293T cells were cultured in DMEM (Sigma, D6429) with 10% FCS (invitrogen, 10106-169), 1% penicillin/streptomycin (Sigma, P4333) and 1% fungizone (Sigma, A2942). Chick embryonic fibroblasts (CEF) were cultured in F-12/HAM (Sigma, #N6658) with 10% FCS, 1% penicillin/streptomycin plus funginoze.

## Cell transient transfection and luciferase assays

HEK293T cells and CEF were cultured at  $10^5$  cells/well in a 12 multiwell plate for 24hr prior to transfection. For luciferase assays, a reaction mix in a final volume of 50 $\mu$ l (for HEK293T) or 100 $\mu$ l (for CEF) in Opti-MEM (Invitrogen, #51985) was made respectively containing 400ng of pGL3basic-*Pax2* promoter or 800ng of pGL3b-*Snail1* promoter vectors and 40ng of CMV-*Renilla* plasmid as endogenous control. To this mix, 50-100-200ng of pCX-*Snail1* or 20-50-100ng of pCX-*Pax2* vectors were added to HEK293T cells or CEF, respectively. Fugene (Fugene, #E2312) was used for HEK293T cells and Lipofectamine (Lipofectamine, #18324-012) for CEF. After adjusting the culture medium to 500 $\mu$ l, the reaction mix for HEK293T was added and cells were assayed for luciferase activity after 48hr. For CEF, the reaction mix was added to 200 $\mu$ l of opti-MEM for 5hr and the medium was replaced with DMEM afterwards. After the transfection, cells were washed twice in PBS and assayed following the manufacturer's instructions (Promega, Dual-Luciferase Reporter Assay System Part#TM040).

## Embryo electroporation

The electroporation conditions were 5 pulses of 4 volts, 50ms and 1Hz frequency. Embryos at HH3-4 were electroporated with 2  $\mu$ g/ $\mu$ l of pCX-*Pax2* or pCX-*Snail1* and 0.5 $\mu$ g/ $\mu$ l of pCX-*EGFP* and cultured until HH11 using the easy culture system (Ocaña et al., 2017).

## In situ hybridization

We used a protocol previously described (Nieto et al., 1996) for non-radioactive in situ hybridization. For double fluorescence ISH we followed the method described in Acloque et al., 2008.

## Cytokine treatment

Acrylic beads (Sigma, heparin acrylic beads #H5263) were embedded in a Bmp7 solution (R&D systems, Recombinant Human BMP7 #354-BP) in PBS. Beads were added to embryos at stage HH9 for 8hr before fixing the embryos.

## Gene cloning and mutagenesis

We used 3 chick embryos at HH11 for DNA genomic extraction with chloroform. A 2kb DNA fragment upstream of TSS of *Snail1* promoter (ENSGAL00000008018) was cloned into pGL3 basic plasmid (Promega) using PWO polymerase (Roche, #11644947001) and NheI and HindIII (Biolabs) target sequences flanking the forward (5'-AAAAAAGCTAGCACCGGGTCTACTTGAATTTTG-3') and reverse (5'-AAAAAAAAGCTTCGTACTCGCCCAGCGCCACCG-3') primers, respectively. To generate subsequent deletions in the *Snail1* promoter, we used the construct mentioned above as a template and the same restriction enzymes target sequences flanking the primers. The primers used were: 1.2kb fragment forward primer (5'-AAAAAAGCTAGCGAATTACGGCAATTG-3'), 0.6kb fragment forward primer (5'-AAAAAAGCTAGCCCCGCTTCAGTGGG G-3') and 0.15kb fragment forward primer (5'-AAAAAAGCTAGCTAGTCTGCCCGCCCCGG-3') with the above described reverse primer.

For the deletion of the Pax2 binding site located at positions -116/-109 from the TSS in the *Snail1* promoter, we used self-complementary primers (forward 5'-CGTCCCATTGGCTCCGGGGGCGGCCC TGCACCGCCCTC-3', reverse 5'-GAGGGCGGTGCAGGGCCGCCCCCGG AGCCAATGGGACG-3') without the Pax2 target sequence (5'-GGGCATGG-3') and carried out whole plasmid amplification. The PCR product was digested with Dnpi (Biolabs) for 5hr and transfected into *E. coli* DH5α strain. To subclone the *Pax2* promoter (NM\_204793.1) we used a BAC (CH261-43k16) containing the *Pax2* locus. Since the chick *Pax2* promoter sequence was not annotated, we identified a conserved region at *Pax2* locus of *Gallus gallus* by ECR-Browser (<http://ecrbrowser.dcode.org>) (galGal3 chrUn\_random:58143187-58143360),

compared this sequence with the chick whole genome by Blast, (<http://blast.ncbi.nlm.nih.gov/Blast.cgi> Traces- WGS) and we found a contig with a fraction of the chick *Pax2* promoter (Nw\_001478025.1). PvuII (Biolabs) and NcoI digestion respectively inside and at the TSS. Allowed us to get a Bac fragment containing the *Pax2* promoter. This was confirmed by southern-blot performed with two  $\alpha$ -P32-dCTP labelled probes, one at Nw\_001478025.1 (forward primer 5'-AAAGAGACGGAGAAGTGTATTTTCG-3', reverse primer 5'-ACGTTTGAGAAAAACAAAGGAAGT-3') and another one at 5'UTR (forward primer 5'-ATTGCTTTGCTTTGGTTTGTATT-3', reverse primer 5'-GAGGCAAAGGAAAGGGAAGA-3'). After isolating the identified band, it was ligated into pGL3 basic plasmid, and transfected into *E. coli* DH5 $\alpha$  that were hybridized with the same probe for confirmation, obtaining a 1,7kb DNA fragment upstream of the TSS of the chick *Pax2* promoter. The cloned sequence is the following:

5' TCT CCG AGA TTC TTT ACT TAA AGC AGG CAG ACA ACA AGG GAC  
CGT TCC GTG GCA GAT AGC GGAGGG GTG GGG AAG GAG GAA AAG AG  
ACG GAG AAG TGT ATT TCG ACG GGT GAT CGG CCC GCA GTC TGC CGA  
ACA AAA TTC AGC TCC CAG CAG TTT CTG CCT CGT CTT CCC ACC TCT  
GGT CCT CAG CCT CAC AGG CGC TCC TTC CCC TCT CTC TGT TCC TTG  
CTA GGG CGC AGC TAC GTC TAT TTT AGC CGT CTA TCA GCT TCT GAA  
ATG ATT TTT AAA TCC CAC TTT AGC TCA ACA TTA CGA AAA AAA AAA  
AAG AAA GAA ACC AAA TGA AAA ATA AAA AAG ATG TGG AAA GTG  
GGA AGT TGA GTT CCT TTG TTT TTC TCA AAC GTG CAA GTG AAA CGT  
GCA AGT GGA AAC TTT GCC ATA ATT GAA ATG ATC TAT TGG TAC AAA  
GAG ATA GAA GGT CTT GCC TCC CTT CCT TCA CTA TTT TTC TTC TTT  
CTT TAA TTT ATT TCA ATT TTC TTT CTG TTA TCC TTT CTT TCT TTC TTT  
CTT TCT TTC TTT CTT TCT TTC TTT CTT TCT TTC TTT CTT TCT TTC TTT  
CTT TCT TTC TTT CTT TCT TTC TTT CTT TCT TTC TTT CTT TCT TTC TTT  
CTT TCT TTC TTT CTT TCC TCT CTC CTCT TCC TTC CTT CCT TCC TTC  
CTT CCT CTC TTT CCT TCC TCT CTT TCC TTC TTC TCT TTC CTT TTT CTC  
TTT CTC TCT TCCTCT CCG TCT TTC ACC TTT CCT ATT CCT CTC CTT CTC  
TCT TTC TCC TTT CCT CTT CCC TTC TTT ATT CAC TTC TTT CTC CCT TTC  
TCT TCC TCT CCG CTA CCC TTT CCC TCC GTT CCC GCT GGC CCC GAT  
GCG TAC GGA CAC CCC CTC CCC GCT CCA GCC CGA GCG AAG TCT CCA  
GCA GCA GCG AGG AGA TGG AAG CAC CGA GCG GGG CCG TGC GAG  
CAG CGG CAG CCC CGG CAC GGA TCG CGG CGA GCC CGG CGC AGG  
CCG AGC TCT GTG AGG CGC TGG GGC CGG GCC GGG CCG GGC CGC CCT  
CCC TGC GCC CTC CGG GGC CCC GCG GCG ACC GGG CCG CCC CCG CAC  
CGC GTC CCG GCG GCG GCT GCG GCC CCC CCG CGC CGA GCG GCG GCC  
CGG CCC TCC TCG CCG CGC TCG GCT CGG CGC GCT GGC GAA TCA GAG  
AGT GTC GGA ATC TAT TGC CTTTGT CTG ACA AGT CAT CCA TCT CCG  
GGG AGG CGG GCG GGG GGC TGA GGG CGC TGC GGC TTT TAG AGA  
GAC ACA CAC CGG GAG AGG AGG CTC CAG TCT CCG GCC CCG GCT CCT

CGC AAG CAC TTC CCA CTC GGG CGC AAG TCC GCC GGG CGC CGG AGC  
TTC CGC CCG GCC GAG AGG AGG GGC GCG CCC GGC CGC CGC TCG CCG  
CTT TCC CGG GGA TTG CTA CTC CAG CGC CAA CTT ACG AAC TGC CCC  
GGA GCC GAG CAG CAG CTG CAG GAG CGC CGC GGC CGC GCC GCC  
CGC CCC CCT CCC CGC CGC CGG GCC CCG GGC CCC AGC CAT GCC CGC  
CGC CTG CCC CCC GGC GCC GCC AGC CCC GAG CCC CCG CCG CCC CCG  
CTG AGC GCC CGC CCG GGA AGC GCC GGC CCC GCG CCC CGG CCC GGC  
CGG CGC CGC TCC TGC GCT CCT CTC CCT CTG TCT GCT TTT CGC TTT  
GGT TTT ATT TTT GT TTG CTT TCG ATT GCT TTG CTT TGG TTT GTT  
ATT TTG GGG TTT TGG GTT TTT TTT CGT TTT TTT TTT TGT TTG TTT  
GTT TGC TTA TTT TTT TCT CCC CTA AGT CTT GAA GTT GAG TTT TAG  
AGG CGA CAC GGC GGC TTC AGC CGA TTT CTT CCC TTT CCT TTG  
CCT CCC C ATG 3'

Where black is UTR, Red is probe sequence target, green is new sequence and blue is Nw\_001478025.1 contig. Now the sequence of Pax2 promoter has been annotated in ensemble.

For the mutagenesis of the Snail1 binding site (E-box) in the *Pax2* promoter, we mutated the E-box sequence (5'-GCAGCTG-3' converted to 5'-TTAGCTA-3') by PCR with the following primers. The primers used were: forward 5'-GCCCCGGAGCCGAGCATTAGCTACAG GAGCGCCGCGGCCG-3' and reverse 5'-CGGCCGCGGCGCTCCTGTAGCTAATG CTCGGCTCCGGGGC-3').

## Southern blot

Bacteria containing the BAC (CH261-43k16) were cultured in 200ml of 2YT medium for 16hr and DNA was extracted with a Genomed Biotech Kit (Jetstar plasmid purification maxi kit 220020). DNA was digested with PvuII and NcoI for 6hr. DNA transfer was carried out into a nylon membrane (Milipore, immobilon-P membrane PVDF, IPVH00010) and hybridization was performed with two different probes, one to detect the region upstream of the TSS of *Pax2* promoter (Nw\_001478025.1) and another one in the 5'UTR of *Pax2* mRNA. The fragment was amplified with specific primers (see cloning and mutagenesis for the sequence), the PCR product was purified and labelled with  $\alpha$ -P<sup>32</sup>-dCTP (Perkin, NEG5134 250uC) following the manufacturer instructions (GE healthcare, radioactive nucleic acid labeling and detection, RPN1633). Hybridization was performed at 65°C o/n and the membrane

washed and air dried for 3 minutes before exposure to identify the corresponding band double positive for both probes.

### Chromatin immunoprecipitation

15 embryos at HH11 were treated following the manufacturer's recommendations (Milipore, Magna ChIP A#17-610) with formaldehyde (Sigma, formaldehyde solution 37% #F1635) and Glycine (Merck #5.00190.1000) with 0.5ml of cytoplasmic buffer lysis and 0.3ml of nuclei buffer lysis. The antibodies used were IgG as negative control (2µl, Diagenode #kch-819-015), anti-Histone3 as positive control (2µg, Ab1791), anti-Pax2 (4µg, Ab23799) and anti-Myc (2µg, Ab9132). For Pax2 interaction with *Snail1* promoter, embryos were used without any treatment. For *Snail1* interaction with *Pax2* promoter, embryos were electroporated prior to ChIP with 0.5µg/µl of a Myc tagged *Snail1* plasmid. The primers used for the amplification of *Snail1* promoter were: forward 5'-CTCCTCGCCCCCTGTA-3', reverse 5'-GTACTCGCCCAGCGCCACC-3', and for the negative control NCR, forward 5'-GCAGCAGCGGCATTATCC-3', reverse 5'-GTCATGAACCCTTTGGCTTTACC-3'. For the amplification of *Pax2* promoter, forward 5'-GCTACTCCAGCGCCAACTTA-3', reverse 5'-GGCCGCGGCGCTCCTGCA-3'.

### Immunohistochemistry

Embryos were washed in PBS-Triton X100 at 0.1% and dehydrated in 25%, 50%, 75% and twice in 100% ethanol for 5 minutes at RT. Then, twice in butanol for 15 minutes and 6 times in wax for 30 minutes at 65°C. Sections were cut at 8 µm and hydrated. A permeabilization step was performed with PBS-Triton X100 at 0.25% twice for 20 minutes. A blocking solution containing PBS-Triton X100 at 0.1% and 10% serum was added for 1hr at RT. Anti-GFP (Santa Cruz #SC9996) antibody was added to the blocking solution at 1/1000 o/n at 4°C. After washing 4 times for 20 minutes at RT with PBS-Triton X100 at 0.1%, a secondary antibody (anti-rabbit-A488, Mol. Probes A-11008) was added at 1/1000 and incubated for 2hr at RT. After washing 4 times for 20 minutes at RT, the slides were mounted with Mowiol (Calbiochem, Mowiol® 4-88 #475904) and imaged.

## Author contribution

J.M.F. performed most of the experiments, analysed and interpreted the data. O.H.O. performed some experiments and with M.A.N conceived the project and interpreted the data. All three wrote the manuscript.

## Acknowledgements

We thank Joan Galceran and Jose Manuel Mingot for helpful discussions and support with the cloning. Sonia Vega for her help and support in managing cell lines, Diana Abad for technical support, Giovanna Expósito for the support at the imaging facility. We also thank Isabel Aller for her help with the southern blot.

## Conflict of interest

Authors declare no conflict of interest.

## Funding

This work was supported by grants from the Spanish Ministry of Science, Innovation and Universities (MICIU RTI2018-096501-B-I00 to MAN), and the European Research Council (ERC AdG 322694) to MAN, who also acknowledges financial support from the Spanish State Research Agency, through the “Severo Ochoa Program” for Centres of Excellence in R&D (SEV-2017-0273).

## REFERENCES

- Acloque, H., Wilkinson, D. G. and Nieto, M. A.** (2008). Chapter 9 In Situ Hybridization Analysis of Chick Embryos in Whole-Mount and Tissue Sections. *Methods Cell Biol* **87**, 169-185
- Acloque, H., Ocaña, O. H., Matheu, A., Rizzoti, K., Wise, C., Lovell-Badge, R. and Nieto, M. A.** (2011). Reciprocal repression between Sox3 and Snail transcription factors defines embryonic territories at gastrulation. *Dev. Cell* **21**, 546–558.
- Acloque, H., Ocaña, O. H. and Nieto, M. A.** (2012). Mutual exclusion of transcription factors and cell behaviour in the definition of vertebrate

- embryonic territories. *Curr. Opin. Genet. Dev.* **22**, 308–314.
- Aulehla, A. and Pourquié, O.** (2010). Signaling gradients during paraxial mesoderm development. *Cold Spring Harb. Perspect. Biol.* **2**, a000869.
- Batlle, E., Sancho, E., Francí, C., Domínguez, D., Monfar, M., Baulida, J. and De Herreros, A. G.** (2000). The transcription factor Snail is a repressor of E-cadherin gene expression in epithelial tumour cells. *Nat. Cell Biol.* **2**, 84–89.
- Bouchard, M., Pfeffer, P. and Busslinger, M.** (2000). Functional equivalence of the transcription factors Pax2 and Pax5 in mouse development. *Development* **127**, 3703–3713.
- Bouchard, M., Souabni, A., Mandler, M., Neubüser, A. and Busslinger, M.** (2002). Nephric lineage specification by Pax2 and Pax8. *Genes Dev.* **16**, 2958–2970.
- Boutet, A., De Frutos, C. A., Maxwell, P. H., Mayol, M. J., Romero, J. and Nieto, M. A.** (2006). Snail activation disrupts tissue homeostasis and induces fibrosis in the adult kidney. *EMBO J.* **25**, 5603–5613.
- Cano, A., Pérez-Moreno, M. A., Rodrigo, I., Locascio, A., Blanco, M. J., Del Barrio, M. G., Portillo, F. and Nieto, M. A.** (2000). The transcription factor Snail controls epithelial-mesenchymal transitions by repressing E-cadherin expression. *Nat. Cell Biol.* **2**, 76–83.
- Cartry, J., Nichane, M., Ribes, V., Colas, A., Riou, J. F., Pieler, T., Dollé, P., Bellefroid, E. J. and Umbhauer, M.** (2006). Retinoic acid signalling is required for specification of pronephric cell fate. *Dev. Biol.* **299**, 35–51.
- Dale, J. K., Malapert, P., Chal, J., Vilhais-Neto, G., Maroto, M., Johnson, T., Jayasinghe, S., Trainor, P., Herrmann, B. and Pourquié, O.** (2006). Oscillations of the snail genes in the presomitic mesoderm coordinate segmental patterning and morphogenesis in vertebrate somitogenesis. *Dev. Cell* **10**, 355–366.
- Del Corral, R. D. and Storey, K. G.** (2004). Opposing FGF and retinoid pathways: A signalling switch that controls differentiation and patterning onset in the extending vertebrate body axis. *BioEssays* **26**, 857–869.
- Dressler, G. R.** (2009). Advances in early kidney specification, development and patterning. *Development* **136**, 3863–3874.
- Dressler, G. R. and Douglass, E. C.** (1992). Pax-2 is a DNA-binding protein



- expressed in embryonic kidney and Wilms tumor. *Proc. Natl. Acad. Sci. U. S. A.* **89**, 1179–1183.
- Dressler, G. R., Deutsch, U., Chowdhury, K., Nornes, H. O. and Gruss, P.** (1990). Pax2, a new murine paired-box-containing gene and its expression in the developing excretory system. *Development* **109**, 787–795.
- Dressler, G. R., Wilkinson, J. E., Rothenpieler, U. W., Patterson, L. T., Williams-Simons, L. and Westphal, H.** (1993). Deregulation of Pax-2 expression in transgenic mice generates severe kidney abnormalities. *Nature* **362**, 65–67.
- Dudley, A. T., Lyons, K. M. and Robertson, E. J.** (1995). A requirement for bone morphogenetic protein-7 during development of the mammalian kidney and eye. *Genes Dev.* **9**, 2795–2807.
- Goldbeter, A., Gonze, D. and Pourquié, O.** (2007). Sharp developmental thresholds defined through bistability by antagonistic gradients of retinoic acid and FGF signaling. *Dev. Dyn.* **236**, 1495–1508.
- Grande, M. T., Sánchez-Laorden, B., López-Blau, C., De Frutos, C. A., Boutet, A., Arévalo, M., Rowe, R. G., Weiss, S. J., López-Novoa, J. M. and Nieto, M. A.** (2015). Snail1-induced partial epithelial-to-mesenchymal transition drives renal fibrosis in mice and can be targeted to reverse established disease. *Nat. Med.* **21**, 989–997.
- Greenfield, H., Lin, J. and Mullins, M. C.** (2021). The BMP signaling gradient is interpreted through concentration thresholds in dorsal-ventral axial patterning. *PLoS Biol.* **19**, e3001059.
- Hou, L., Du, Y., Zhao, C. and Wu, Y.** (2018). PAX2 may induce ADAM10 expression in renal tubular epithelial cells and contribute to epithelial-to-mesenchymal transition. *Int. Urol. Nephrol.* **50**, 1729–1741.
- Imgrund, M., Gröne, E., Gröne, H. J., Kretzler, M., Holzman, L., Schlöndorff, D. and Rothenpieler, U. W.** (1999). Re-expression of the developmental gene Pax-2 during experimental acute tubular necrosis in mice. In *Kidney International* **56**, 1423–1431.
- James, R. G. and Schultheiss, T. M.** (2003). Patterning of the avian intermediate mesoderm by lateral plate and axial tissues. *Dev. Biol.* **253**, 109–124.

- James, R. G. and Schultheiss, T. M.** (2005). Bmp signaling promotes intermediate mesoderm gene expression in a dose-dependent, cell-autonomous and translation-dependent manner. *Dev. Biol.* **288**, 113–125.
- Lindoso, R. S., Verdoorn, K. S. and Einicker-Lamas, M.** (2009). Renal recovery after injury: The role of Pax-2. *Nephrol. Dial. Transplant.* **24**, 2628–2633.
- Lovisa, S., LeBleu, V. S., Tampe, B., Sugimoto, H., Vадnagara, K., Carstens, J. L., Wu, C. C., Hagos, Y., Burckhardt, B. C., Pentcheva-Hoang, T., et al.** (2015). Epithelial-to-mesenchymal transition induces cell cycle arrest and parenchymal damage in renal fibrosis. *Nat. Med.* **21**, 998–1009.
- Luo, G., Hofmann, C., Bronckers, A. L. J. J., Sohocki, M., Bradley, A. and Karsenty, G.** (1995). BMP-7 is an inducer of nephrogenesis, and is also required for eye development and skeletal patterning. *Genes Dev.* **9**, 2808–2820.
- Lyons, K. M., Hogan, B. L. M. and Robertson, E. J.** (1995). Colocalization of BMP 7 and BMP 2 RNAs suggests that these factors cooperatively mediate tissue interactions during murine development. *Mech. Dev.* **50**, 71–83.
- Massagué, J.** (2012). TGF $\beta$  signalling in context. *Nat. Rev. Mol. Cell Biol.* **13**, 616–630.
- Narlis, M., Grote, D., Gaitan, Y., Boualia, S. K. and Bouchard, M.** (2007). Pax2 and Pax8 regulate branching morphogenesis and nephron differentiation in the developing kidney. *J. Am. Soc. Nephrol.* **18**, 1121–1129.
- Nieto, M. A., Sargent, M. G., Wilkinson, D. G. and Cooke, J.** (1994). Control of cell behavior during vertebrate development by Slug, a zinc finger gene. *Science.* **264**, 835–839.
- Nieto, M. A., Patel, K. and Wilkinson, D. G.** (1996). In Situ hybridization analysis of chick embryos in whole mount and tissue sections. *Methods Cell Biol.* **51**, 219-235.
- Niwa, H., Toyooka, Y., Shimosato, D., Strumpf, D., Takahashi, K., Yagi, R. and Rossant, J.** (2005). Interaction between Oct3/4 and Cdx2 determines trophectoderm differentiation. *Cell* **123**, 917–929.

- Obara-Ishihara T, Kuhlman J, Niswander L, Herzlinger D.** (1999). The surface ectoderm is essential for nephric duct formation in intermediate mesoderm. *Development* **126**, 1103-1108.
- Ocaña, O. H., Córcoles, R., Fabra, Á., Moreno-Bueno, G., Acloque, H., Vega, S., Barrallo-Gimeno, A., Cano, A. and Nieto, M. A.** (2012). Metastatic Colonization Requires the Repression of the Epithelial-Mesenchymal Transition Inducer Prrx1. *Cancer Cell* **22**, 709–724.
- Ocaña, O. H., Coskun, H., Minguillón, C., Murawala, P., Tanaka, E. M., Galcerán, J., Muñoz-Chápuli, R. and Nieto, M. A.** (2017). A right-handed signalling pathway drives heart looping in vertebrates. *Nature* **549**, 86-90
- Olivera-Martinez, I. and Storey, K. G.** (2007). Wnt signals provide a timing mechanism for the FGF-retinoid differentiation switch during vertebrate body axis extension. *Development* **134**, 2125–2135.
- Peinado, H., Quintanilla, M. and Cano, A.** (2003). Transforming growth factor  $\beta$ -1 induces Snail transcription factor in epithelial cell lines. Mechanisms for epithelial mesenchymal transitions. *J. Biol. Chem.* **278**, 21113–21123.
- Rothenpieler, U. W. and Dressler, G. R.** (1993). Pax-2 is required for mesenchyme-to-epithelium conversion during kidney development. *Development* **119**, 711–720.
- Sato, M., Muragaki, Y., Saika, S., Roberts, A. B. and Ooshima, A.** (2003). Targeted disruption of TGF- $\beta$ 1/Smad3 signaling protects against renal tubulointerstitial fibrosis induced by unilateral ureteral obstruction. *J. Clin. Invest.* **112**, 1486–1494.
- Tamimi, Y., Ekuere, U., Loughton, N. and Grundy, P.** (2008). WNT5A is regulated by PAX2 and may be involved in blastemal predominant wilms tumorigenesis. *Neoplasia* **10**, 1470–1480.
- Thiery, J. P., Acloque, H., Huang, R. Y. J. and Nieto, M. A.** (2009). Epithelial-Mesenchymal Transitions in Development and Disease. *Cell* **139**, 871–890.
- Torres, M., Gómez-Pardo, E., Dressler, G. R. and Gruss, P.** (1995). Pax-2 controls multiple steps of urogenital development. *Development* **121**, 4057–4065.

- Tucker, J. A., Mintzer, K. A. and Mullins, M. C.** (2008). The BMP Signaling Gradient Patterns Dorsoventral Tissues in a Temporally Progressive Manner along the Anteroposterior Axis. *Dev. Cell* **14**, 108–119.
- Vukicevic, S., Koppt, J. B., Luyten, F. P. and Sampath, T. K.**(1996). Induction of nephrogenic mesenchyme by osteogenic protein 1 (bone morphogenetic protein 7). *Dev. Biol.* **93**, 9021-9026.
- Wingert, R. A., Selleck, R., Yu, J., Song, H. D., Chen, Z., Song, A., Zhou, Y., Thisse, B., Thisse, C., McMahon, A. P., et al.** (2007). The cdx genes and retinoic acid control the positioning and segmentation of the zebrafish pronephros. *PLoS Genet.* **3**, 1922–1938.
- Yang, J. H., Kim, N. H., Yun, J. S., Cho, E. S., Cha, Y. H., Cho, S. B., Lee, S. H., Cha, S. Y., Kim, S. Y., Choi, J., et al.** (2020). Snail augments fatty acid oxidation by suppression of mitochondrial ACC2 during cancer progression. *Life Sci. Alliance* **3**, e202000683.
- Zavadil, J., Cermak, L., Soto-Nieves, N. and Böttinger, E. P.** (2004). Integration of TGF- $\beta$ /Smad and Jagged1/Notch signalling in epithelial-to-mesenchymal transition. *EMBO J.* **23**, 1155–1165.
- Zeisberg, M., Hanai, J. I., Sugimoto, H., Mammoto, T., Charytan, D., Strutz, F. and Kalluri, R.** (2003). BMP-7 counteracts TGF- $\beta$ 1-induced epithelial-to-mesenchymal transition and reverses chronic renal injury. *Nat. Med.* **9**, 964-968.
- Zeisberg, M., Shah, A. A. and Kalluri, R.** (2005). Bone morphogenetic protein-7 induces mesenchymal to epithelial transition in adult renal fibroblasts and facilitates regeneration of injured kidney. *J. Biol. Chem.* **280**, 8094–8100.
- Zhou, J. X. and Huang, S.** (2011). Understanding gene circuits at cell-fate branch points for rational cell reprogramming. *Trends Genet.* **27**, 55–62.

## Figures

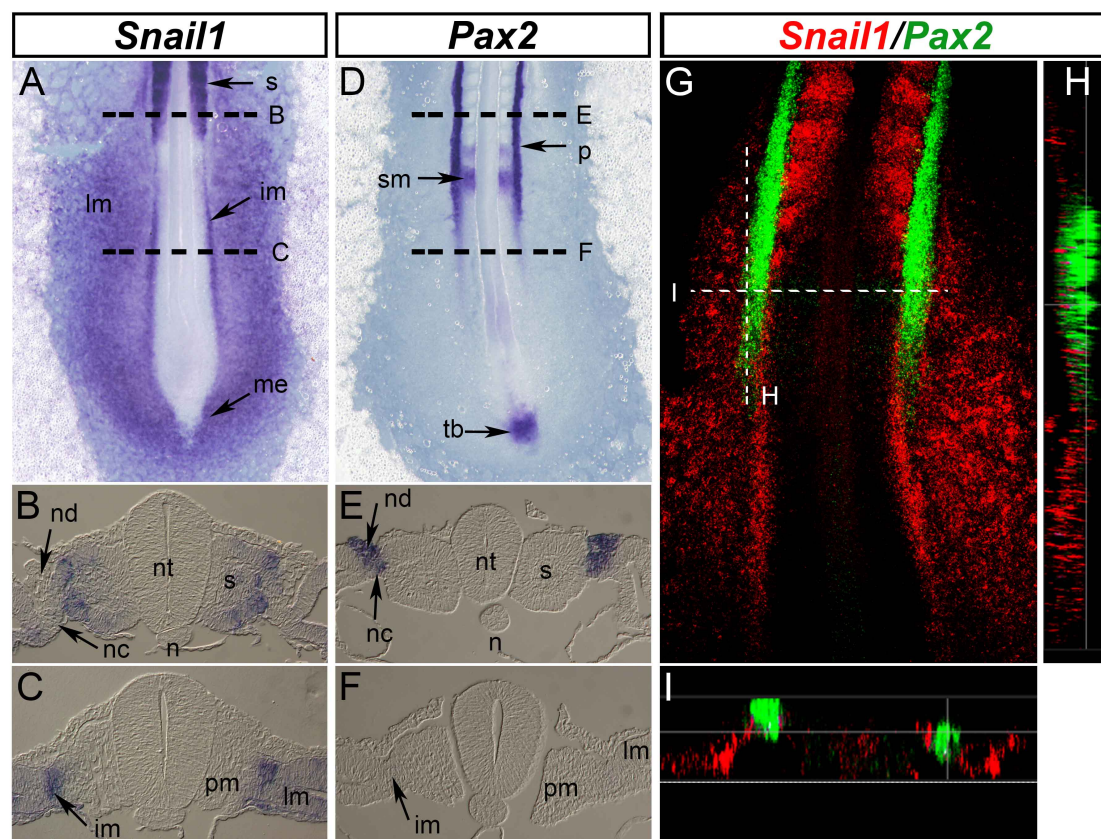

**Fig. 1. *Snail1* and *Pax2* are expressed in a mutually exclusive pattern in the developing embryo.**

Dorsal view of chicken embryos at HH11 and their transversal sections. (A-C) *Snail1* is expressed in the ingressing mesendoderm (me), undifferentiated intermediate mesoderm (im), lateral plate mesoderm (Im) and somites (s) (n=10). (D-F) *Pax2* is expressed in the pronephros (p), somitomeres (sm) and in the tail bud (tb) (n=10). (G) 3D reconstruction of a double *in situ* hybridization (FISH) for *Snail1* (red) and *Pax2* (green) (n=3). Longitudinal (H) and Transversal (I) optical sections from the indicated level in a representative embryo in G. Note the mutually exclusive expression pattern. n: notochord, nc: nephric cord, nd: nephric duct, nt: neural tube, pm: paraxial mesoderm.



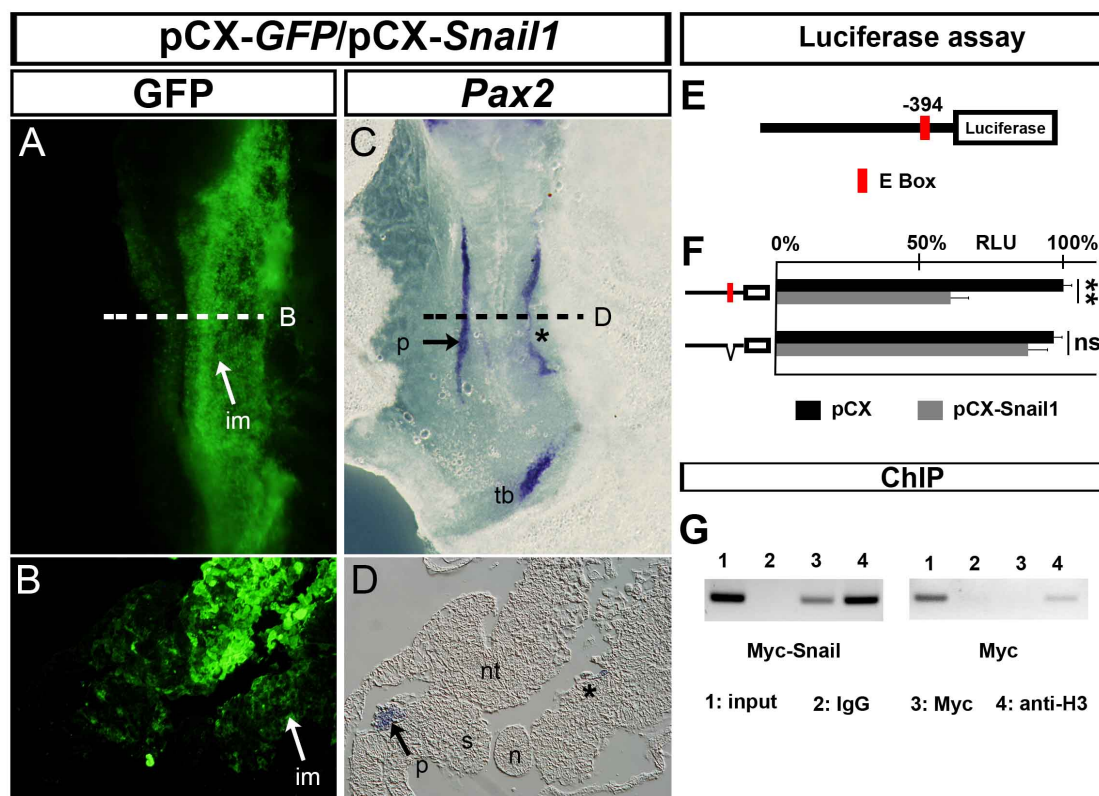

**Fig. 2. Snail1 is a direct repressor of *Pax2* transcription.**

(A-D) Chick embryos were co-electroporated on the right side with a vector encoding GFP (pCX-GFP) and another containing the *Snail1* coding region (pCX-Snail1). Dorsal views and their respective sections showing GFP immunofluorescence (A,B) and *Pax2* expression (C,D). *Snail1* ectopic expression (GFP in A,B) represses endogenous *Pax2* expression (C,D) in the intermediate mesoderm (A, B, white arrows; C, D, black asterisks) (n=9/9). (E) Scheme of *Pax2* promoter fragment (1.8 kb upstream of TSS) cloned into pGL3-Luc vector. A Snail1 binding site (E box) is showed in red. (F) Luciferase assay in HEK293T cells transfected with a vector containing a fragment of the *Pax2* promoter bearing the wildtype or a mutated version of the E box plus either pCX (black bars) or pCX-Snail1 (grey bars) vectors. Snail1 decreases *Pax2* promoter activity and the mutation of the E box significantly restores the activity (n=3, average representation. T-Test; pValue<0.01; two tails, unequal variance). (G) ChIP assay in chick embryos electroporated with a Myc-tagged Snail1 coding plasmid (Myc-Snail1) or an empty Myc plasmid (Myc) (n=3, representative experiment shown). (1) input; (2) IgG antibody (IgG), negative control; (3) Myc antibody (anti-Myc); (4) Histone3 antibody (anti-H3), positive control. There is amplification of DNA fragments containing the E box in the presence of Myc-Snail1. Therefore, Snail1 represses *Pax2* transcription through direct binding to its promoter. im: intermediate mesoderm, n: notochord, nt: neural tube, p: pronephros, s: somites. tb: tail bud. \*\* pValue <0.001.

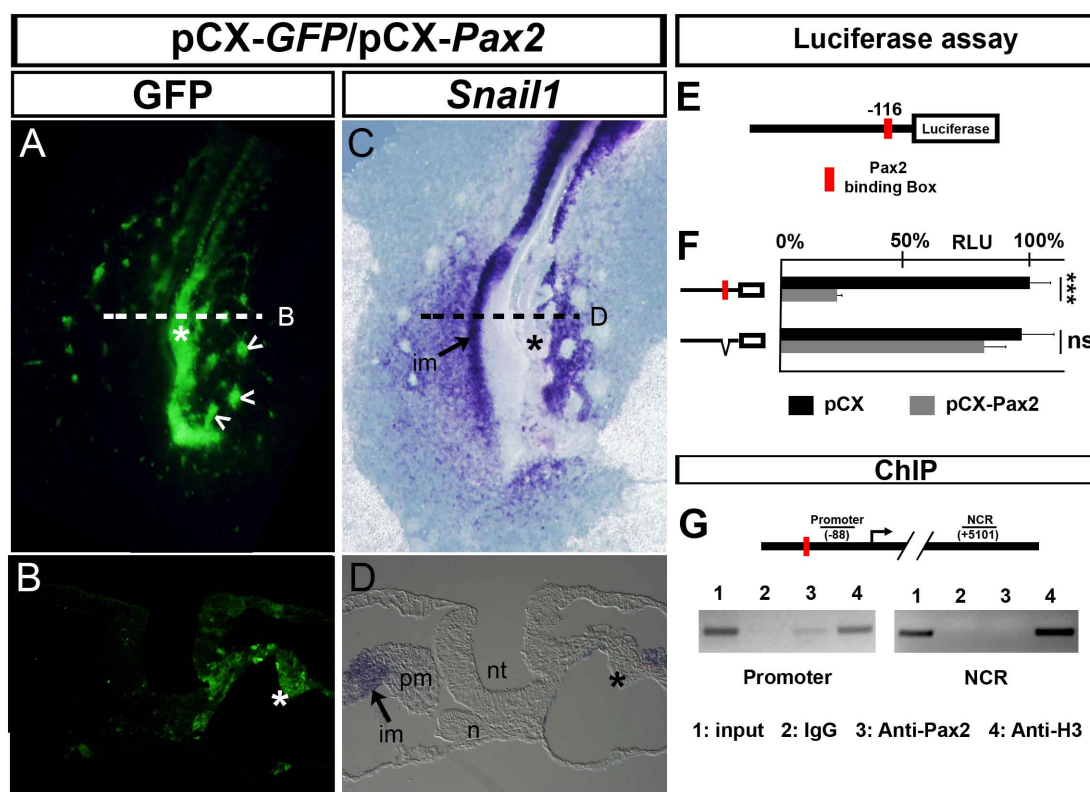

**Fig. 3. Pax2 is a direct repressor of *Snail1* transcription.**

(A-D) Electroporation on the right side of a chick embryo with pCX-GFP plus pCX-Pax2 vectors showing IF for GFP (A,B) and ISH for *Snail1* (C,D). (A,C) Dorsal views. (B,D) Sections taken at the level of the dashed lines. Pax2 ectopic expression (GFP) represses *Snail1* expression in the intermediate mesoderm (asterisks) (n=18/18). (E) Scheme of *Snail1* promoter fragment (0.15kb upstream of TSS) cloned into pGL3-Luc vector. A Pax2 binding box is shown in red. (F) Luciferase assay in CEF transfected with a *Snail1* promoter vector containing or not the Pax2 binding box plus pCX (black bars) or pCX-Pax2 (grey bars) plasmids. Pax2 decreases *Snail1* promoter activity and the deletion of the box restores it (n=3, average representation. T-Test; two tails, unequal variance). (G) ChIP assay. Scheme showing the PCR fragments analyzed, one in the promoter region and another one from a Non Coding Region (NCR). (1) input; (2) IgG antibody (IgG), negative control; (3) Pax2 antibody (anti-Pax2); (4) Histone3 antibody (anti-H3), positive control. (n=3, representative experiment shown). Pax2 represses *Snail1* transcription through direct binding to the promoter. im: intermediate mesoderm, n: notochord, nt: neural tube, pm: paraxial mesoderm. \*\*\*pValue<0.0001



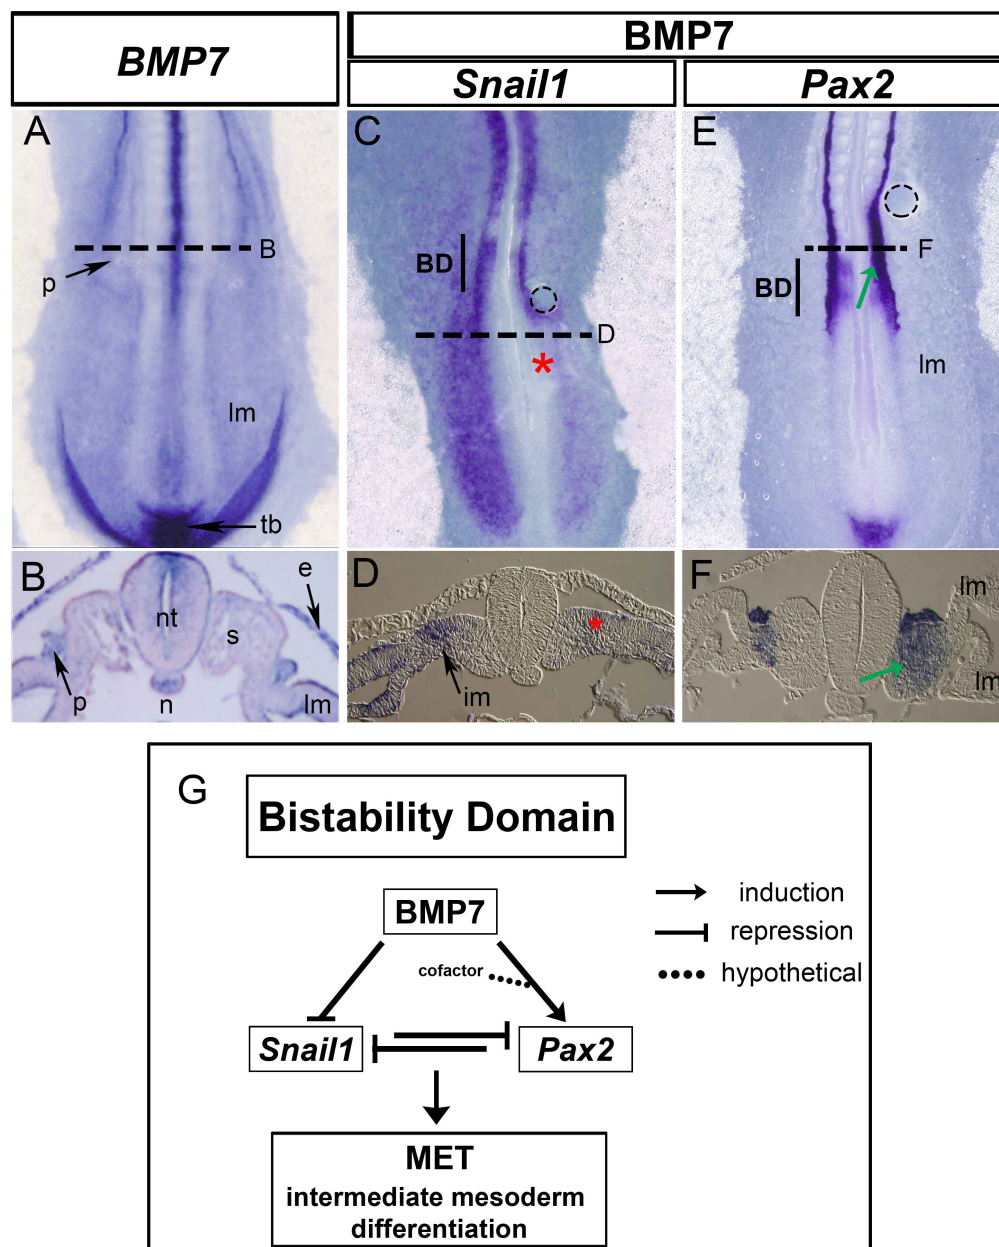

**Fig. 4. BMP7 represses *Snail1* and induces *Pax2* expression.**

(A,B) ISH for *Bmp7* and the respective transverse sections. *Bmp7* is expressed in the ectoderm (e), dorsal neural tube (nt), notochord (n), pronephros (p) and tail bud (tb). (C-F) Chick embryos bearing a bead (dotted circle) previously soaked in BMP7 (50µg/ml) and subjected to ISH for *Snail1* (C,D) or *Pax2* (E,F). BMP7 represses *Snail1* in the mesoderm (C,D, asterisks, n=3/5) and induces *Pax2* expression in the bistability domain (BD) (E,F, arrows, n=3/5). G) Model for pronephros differentiation. *Bmp7* directs the flow of information by repressing *Snail1* and inducing *Pax2* to promote renal differentiation through MET in the intermediate mesoderm within the BD. s: somites, Im: lateral mesoderm, im: intermediate mesoderm.
